# Supplementary material for: From intracellular signaling to population oscillations: bridging size- and time-scales in collective behavior
Source: PubMed Central journal article supplement (PMC4332153; doi:10.15252/msb.20145352), 2015-01-23

Figure S2

A

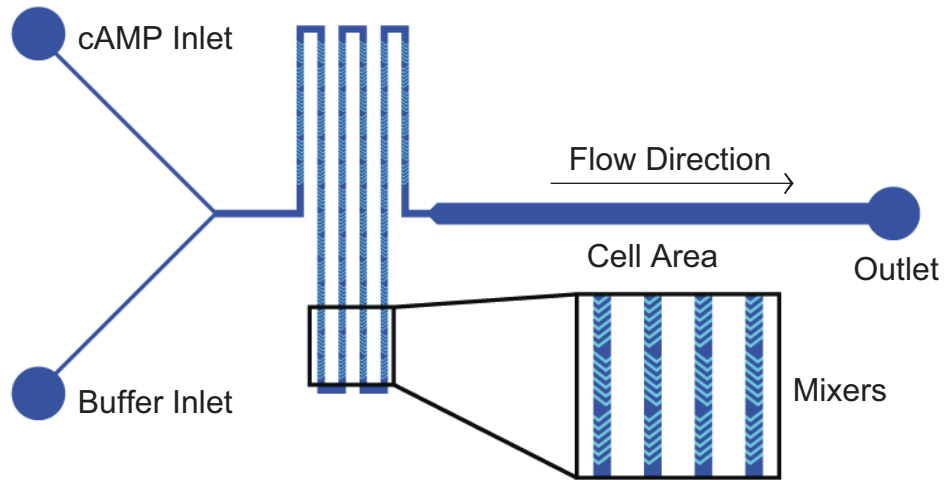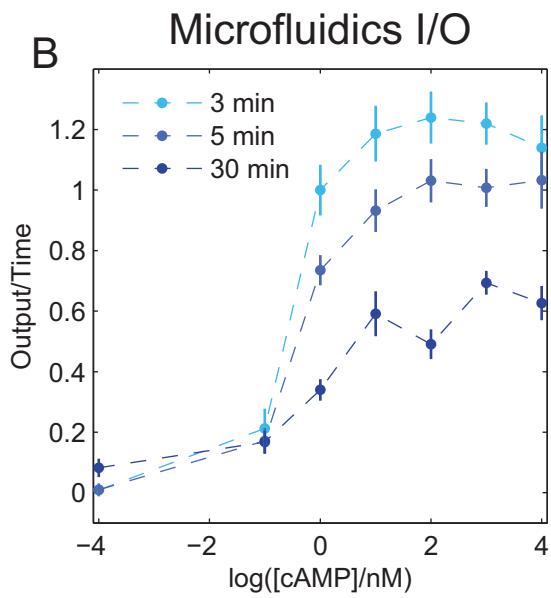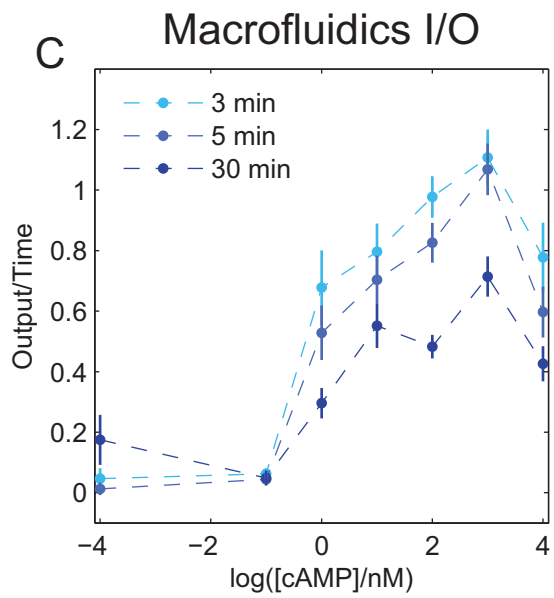

Supplement: msb0011-0779-sd2.pdf [file msb0011-0779-sd2.pdf]
